# Supplementary material
Source: publisher figshare collection journal article supplement (https://frontiersin.figshare.com/ndownloader/files/13607312)
Supplement: Supplementary file 1 [file 13607312]

## Sheet: Sheet1
Table S1. List of policy instruments used in marine conservation practices in European waters and contiguous seas
Regulatory Body	Policy instrument	Nature of instrument	Year of establishment	Conservation targets	Specific targets	Conservation Tools	Web link	Binding	Baltic Sea	N-E Atlantic	Mediterrannean Sea	Black Sea
International Whaling Commission (IWC)	International convention for the regulation of whaling (ICRW)	International convention	1946	Provide for the proper conservation of whale stocks	Provide for the complete protection of certain species; designate specified areas as whale sanctuaries; set limits on the numbers and size of whales which may be taken; prescribe open and closed seasons and areas for whaling; and prohibit the capture of suckling calves and female whales accompanied by calves	1982 moratorium on commercial whaling. International Observer Scheme among selected Parties to ensure their land-based whaling stations are in compliance of the IWC	https://archive.iwc.int/pages/view.php?ref=3607&k=	YES	X	X	X	X
Ramsar Convention	Ramsar Convention on wetlands	Intergovernmental convention	1971	Conservation and sustainable use of wetlands and their resources	Protection of wetlands of international importance especially as waterfowl habitat	List of Wetlands of International Importance. Ramsar Sites Information Service (RSIS)	http://archive.ramsar.org/cda/en/ramsar-documents-texts/main/ramsar/1-31-38_4000_0__	YES	X	X	X	X
CITES	Convention on International Trade in Endangered Species of Wild Fauna and Flora (CITES)	Intergovernmental convention	1973	Ensure that international trade in specimens of wild animals and plants does not threaten their survival	The Parties shall take appropriate measures to enforce the provisions of the Convention and to prohibit trade in specimens in violation thereof. These shall include measures: (a) to penalize trade in, or possession of, such specimens, or both; and (b) to provide for the confiscation or return to the State of export of such specimens	Appendices of species subject to CITES control: App. I (species threatened with extinction), App. II (species not necessarily threatened with extinction, but in which trade must be controlled in order to avoid utilization incompatible with their survival), App. III (species that are protected in at least one country)	https://www.cites.org/eng/disc/text.php	YES	X	X	X	X
Barcelona Convention	Convention for the protection of the marine environment and the coastal region of the Mediterranean (Barcelona Convention, amended in 1995)	Regional agreement	1976	Prevent, abate, combat and to the fullest possible extent eliminate pollution of the Mediterranean Sea area and to protect and enhance the marine environment in that area so as to contribute towards its sustainable development. Implement the Mediterranean Action Plan. Pursue the protection of the marine environment and the natural resources	Apply the precautionary principle. Apply the polluter pays principle. Undertake environmental impact assessment. Promote cooperation between and among States in environmental impact assessment procedures. Promote the integrated management of the coastal zones, taking into account the protection of areas of ecological and landscape interest and the rational use of natural resources.	Seven protocols: Prevention of pollution by dumping from ships and aircraft; Prevention of pollution from ships and, in cases of emergency, combating pollution; Pollution from land-based sources and activities; Specially Protected Areas and biological diversity; Pollution resulting from exploration and exploitation of the continental shelf and the seabed and its subsoil; Pollution by transboundar…	https://wedocs.unep.org/bitstream/handle/20.500.11822/7096/Consolidated_BC95_Eng.pdf	YES			X
Council of Europe	Bern Convention on the Conservation of European Wildlife and Natural Habitats	International convention	1979	The Bern Convention is a binding international legal instrument in the field of nature conservation, covering most of the natural heritage of the European continent and extending to some States of Africa.	To conserve wild flora and fauna and their natural habitats, as well as to promote European co-operation in this field. The treaty also takes account of the impact that other policies may have on natural heritage and recognises the intrinsic value of wild flora and fauna, which needs to be preserved and passed to future generations.	Assessing and recording the conservation status of the populations of species listed in the appendices to the Convention, identifying species at risk, devising processes affecting loss of wild biologicaldive rsity, setting up models to monitor change in wildlifeoutside protected areas. Common management standards may be proposed through action plans. Monitoring of the implementation of Articles 5…	https://www.coe.int/en/web/bern-convention	YES	X	X	X	X
Covention on Migratory Species (CMS)	Convention on the Conservation of Migratory Species of Wild Animals (Bonn Convention)	International convention	1979	Conserve entire populations or any geographically separate part of the population of any species or lower taxon, a significant proportion of whose members cyclically and predictably cross one or more national boundaries	Protect the species in Appendix I (migratory species threatened with exticntion), conserving or restoring the places where they live, mitigating obstacles to migration and controlling other factors that might endanger them. Address species in Appendix II (migratory species in need of international cooperation for their safeguard) with global or regional agreements	Appendix I – Endangered migratory species. Appendix II - Migratory species conserved through Agreements. The Convention uses Agreements, Memoranda of Understanding and Special Species Initiatives to ensure the protection and conservation of migratory species listed in the two Appendices	https://www.cms.int/en/convention-text	YES	X	X	X	X
European Union	Directive on the conservation of natural habitats and of wild fauna and flora (Habitats Directive, 1992/43/EC)	EU directive	1992	Mantain or restore, at favourable conservation status, natural habitats and species of wild fauna and flora of Community interest, taking account of economic, social, cultural and regional requirements.	List habitats and species to be protected (Annexes I, II, IV, V). Countries have to designate Sites of Community Importance (SCIs) and Special Areas of Conservation (SACs) and prohibit specific capture methods	Natura 2000 network made of SPAs, SCIs and SACs, which shall enable the natural habitat types and the species' habitats concerned to be maintained or, where appropriate, restored at a favourable conservation status in their natural range	http://eur-lex.europa.eu/legal-content/EN/TXT/PDF/?uri=CELEX:01992L0043-20070101&qid=1499179159461&from=en	YES	X	X	X	X
United Nations	Convention on Biological Diversity (CBD)	International convention	1992	Conservation of biological diversity; sustainable use of its components; fair and equitable sharing of benefits arising from genetic resources	Five strategic goals define the main objectives of the Convention through the twenty Aichi Targets	The National Biodiversity Strategies and Action Plans are intended to implement the Convention at the national level	https://www.cbd.int/doc/legal/cbd-en.pdf	YES	X	X	X	X
ASCOBANS	Agreement on the Conservation of Small Cetaceans of the Baltic, North East Atlantic, Irish and North Seas - ASCOBANS (amended in 2003)	Regional agreement	1992	Conservation of small cetaceans of the Baltic, North East Atlantic, Irish and North Seas	The Parties undertake to cooperate closely in order to achieve and maintain a favourable conservation status for small cetaceans. Institutions, Coordinating Authority, The Secretariat, The Advisory Committee and financing are all defined in the Agreement	A list of species and threats are specified in the agreement	http://www.ascobans.org/en/documents/agreement-text	YES	X	X
Baltic Marine Environment Protection Commission - Helsinki Commission	Helsinki Convention on the Protection of the Marine Environment of the Baltic Sea Area (HELCOM Convention)	Regional agreement	1992	Prevent and eliminate pollution in order to promote the ecological restoration of the Baltic Sea Area and the preservation of its ecological balance. Conserve natural habitats and biological diversity and protect ecological processes	Application of (1) precautionary principle, (2) polluter pays principle, (3) best available techniques (BAT), (4) best environmental practice (BEP). Establishment of complementary or joint programmes of scientific or technical research	A Commission is established to keep the implementation of the Convention under continuous observation	http://www.helcom.fi/Documents/About%20us/Convention%20and%20commitments/Helsinki%20Convention/Helsinki%20Convention_July%202014.pdf	YES	X
Commission on the Protection of the Black Sea Against Pollution	Convention on the Protection of the Black Sea Against Pollution (Bucharest Convention)	Regional agreement	1992	Prevent, reduce and control the pollution in the Black Sea in order to protect and preserve the marine environment		A Commission and a Permanent Secretariat are established to promote the implementation of the Convention. Specific protocols on: (1) the control of land-based sources of pollution; (2) dumping of waste; and (3) joint action in the case of accidents (such as oil spills)	http://www.blacksea-commission.org/_convention.asp	YES				X
OSPAR Commission	Oslo and Paris Convention for the protection of the marine environment of the North-East Atlantic (OSPAR)	Regional agreement	1992	Prevent and eliminate pollution and protect the maritime area against the adverse effects of human activities so as to safeguard human health and to conserve marine ecosystems and, when practicable, restore marine areas which have been adversely affected	Application of (1) precautionary principle, (2) polluter pays principle, (3) best available techniques (BAT), (4) best environmental practice (BEP). Establishment of complementary or joint programmes of scientific or technical research	A Commission and a Permanent Secretariat are established. The Commission shall draw up programmes and measures for the prevention and elimination of pollution and for the control of activities which may, directly or indirectly, adversely affect the maritime area	https://www.ospar.org/convention	YES	X	X
United Nations	Agenda 21	UN action plan	1992	Attain sustainable development at the global level taking into account the social and economic dimension as well as the environmental dimension	Section II aims - among other things - at conserving the biological diversity and at protecting the oceans and the coastal areas	Programme areas are identified for each of the four sections of the Agenda. A specific section with the means of implementation is provided	https://sustainabledevelopment.un.org/content/documents/Agenda21.pdf	NO	X	X	X	X
FAO	FAO Code of conduct for responsible fisheries	International recommendation	1995	Ensure the effective conservation, management and development of living aquatic resources, with due respect for the ecosystem and biodiversity	Ensure the conservation of target species but also of the other species belonging to the same ecosystem through fisheries management the use of selective and the use of environmentally safe fishing gear. Prevent overfishing. Undertake research and data collection in order to improve scientific and technical knowledge of fisheries including their interaction with the ecosystem. Protect critical fi…	Countries are requested to to collaborate in the fulfillment and implementation of the objectives and principles contained in the Code. FAO is requested to elaborate technical guidelines in support of the implementation of the Code and to monitor and report on the implementation of the Code and its effects on fisheries	http://www.fao.org/fishery/code/en	NO	X	X	X	X
United Nations	Agreement for the Conservation and Management of Straddling Fish Stocks and Highly Migratory Fish Stocks	Multilateral treaty	1995	To ensure the long-term conservation and sustainable use of straddling fish stocks and highly migratory fish stocks through effective implementation of the relevant provisions of the UNCLOS convention	Ensure long-term sustainability of straddling fish stocks and highly migratory fish stocks. Apply the precautionary approach. Assess the impacts of fishing. Adopt, where necessary, conservation and management measures. Minimize pollution, waste, discards, catch by lost or abandoned gear, catch of non-target species and impacts on associated or dependent species. Protect biodiversity in the marine…	Mechanisms for international cooperation are foressen that include, inter alia: - Cooperation for conservation and management; - Fisheries management organizations and arrangements; - Collection and provision of information and cooperation in scientific research.	https://documents-dds-ny.un.org/doc/UNDOC/GEN/N95/274/67/PDF/N9527467.pdf	YES	X	X	X	X
ACCOBAMS	Agreement on the conservation of cetaceans of the Black sea, Mediterranean sea and contiguous Atlantic area (ACCOBAMS)	Regional agreement	1996	Achieve and maintain a favourable conservation status for cetaceans. Reduce threats to cetaceans notably by improving current knowledge on these animals	Prohibit and take all necessary measures to eliminate, where this is not already done, any deliberate taking of cetaceans. Co‐operate to create and maintain a network of specially protected areas to conserve cetaceans	Conservation Plan addressing the adoption and enforcement of national legislation, the assessment and management of human‐cetacean interactions, habitat protection, research and monitoring, capacity building, dissemination and training, and the responses to emergency situations	http://www.accobams.org/new_accobams/wp-content/uploads/2017/01/ACCOBAMS_Text_Agreement_English.pdf	YES			X	X
Ministries of the Environment of Italy, France and Monaco Principality	International Agreement on the creation of a marine mammal sanctuary in the Mediterranean (Pelagos Sanctuary)	International agreement	1999	To ensure the favourable conservation status of marine mammals, by protecting both them and their habitat, from any negative direct or indirect impacts resulting from human activities	To monitor activities within the Sanctuary and fight against any form of pollution, phasing out the release of toxic compounds. To prohibit any deliberate take or intentional disturbance of marine mammals. To comply with international regulations on pelagic drift net. To forbid high-speed motorboat competitions within the Sanctuary	Periodic assessment of marine mammal population status, causes of mortality and threats to their habitat	http://www2.ecolex.org/server2neu.php/libcat/docs/TRE/Full/En/TRE-001399.txt	YES			X
European Union	Directive establishing a framework for Community action in the field of water policy (Water Framework Directive, 2000/60/EC)	EU directive	2000	Establish a framework for the protection of inland surface waters, transitional waters, coastal waters (up to one nautical mile from the coastline) and groundwater	Aim at a 'good status' for all ground and surface waters (rivers, lakes, transitional waters, and coastal waters) in the EU according to biological, hydromorphological, physical-chemical and chemical quality	Register of protected areas	http://eur-lex.europa.eu/resource.html?uri=cellar:5c835afb-2ec6-4577-bdf8-756d3d694eeb.0004.02/DOC_1&format=PDF	YES	X	X	X	X
European Union	Council regulation on the conservation and sustainable exploitation of fisheries resources under the Common Fisheries Policy (2371/2002)	EU regulation	2002	Ensure exploitation of living aquatic resources that provides sustainable economic, environmental and social conditions	Application of the precautionary approach in taking measures designed to protect and conserve living aquatic resources, to provide for their sustainable exploitation and to minimise the impact of fishing activities on marine eco-systems. Aims at a progressive implementation of an ecosystem-based approach to fisheries management	Scientific, Technical and Economic Committee for Fisheries (STECF). Recovery plans. Management plans. Emergency measures. Adjustment of fishing capacity. Fishing fleet registers. Control and enforcement system. Decision-making and consultation tools	http://eur-lex.europa.eu/LexUriServ/LexUriServ.do?uri=OJ:L:2002:358:0059:0080:EN:PDF	YES	X	X	X	X
International Maritime Organization	International Convention for the Control and Management of Ships' Ballast Water and Sediments	International convention	2004	It aims to prevent the spread of harmful aquatic organisms from one region to another, by establishing standards and procedures for the management and control of ships' ballast water and sediments	Promote and facilitate scientific and technical research on ballast water management; and monitor the effects of ballast water management in waters under their jurisdiction. Technical assistance, Management and Control Requirements for Ships and Standards are also specified.	The Convention will require all ships to implement a Ballast Water and Sediments Management Plan. All ships will have to carry a Ballast Water Record Book and will be required to carry out ballast water management procedures to a given standard. Existing ships will be required to do the same, but after a phase-in period. Parties to the Convention are given the option to take additional measures w…	http://www.imo.org/en/About/conventions/listofconventions/pages/international-convention-for-the-control-and-management-of-ships'-ballast-water-and-sediments-(bwm).aspx	YES	X	X	X	X
General Fisheries Commission for the Mediterranean (GFCM)	Recommendation on the management of certain fisheries exploiting demersal and deep-water species and the establishment of a fisheries restricted area below 1000 m (GFCM/29/2005/1)	GFCM recommendation	2005	Conservation of deep-sea fisheries and ecosystems	Prohibit the use of dredges and trawl nets at depths beyond 1000 m	Ban on bottom-towed gear at depths beyond 1000 m	https://gfcm.sharepoint.com/CoC/_layouts/15/guestaccess.aspx?docid=068a6005df3d2423e8d26f2bec9921b82&authkey=AbqexZ9izDTq3P_mPSisHmQ	YES			X	X
International Maritime Organization	Revised Guidelines for the Identification and Designation of Particularly Sensitive Sea Areas	IMO resolution	2005	Protection of significant areas which may be vulnerable to damage by international maritime activities. There are sixteen PSSAs, located all over the world. Some are large, like the Western European Waters, and some protect tiny gems of nature like Malpelo Island in the Pacific Ocean	Specific target starts are unique or rare ecosystem, diversity of the ecosystem or vulnerability to degradation by natural events or human activities; social, cultural and economic activities such as significance of the area for recreation or tourism; and scientific and educational activities such as biological research or historical value.	When an area is approved as a particularly sensitive sea area, specific measures can be used to control the maritime activities in that area, such as routeing measures, strict application of MARPOL discharge and equipment requirements for ships, such as oil tankers; and installation of Vessel Traffic Services (VTS).	http://www.imo.org/en/OurWork/Environment/PSSAs/Documents/A24-Res.982.pdf	YES	X	X	X	X
European Union	Council regulation concerning management measures for the sustainable exploitation of fishery resources in the Mediterranean Sea (1967/2006)	EU regulation	2006	Conservation, management and exploitation of living aquatic resources where such activities are pursued in the maritime waters of the Mediterranean Sea by Community fishing vessels	Designation of fishing protected areas. Restrictions on fishing gears and practices. Designation of minimum sizes of marine organisms. Regulation of non-commercial fishing. Definition of fisheries management plans. Designation of control measures. Regulation of fisheries of highly migratory species.	Fishing protected areas. Fisheries management plans. Limits and restrictions to fihing gears. Minimum sizes of marine organisms. 25-mile management zone around Malta	http://eur-lex.europa.eu/legal-content/EN/TXT/PDF/?uri=CELEX:32006R1967&from=en	YES			X
European Union	Directive establishing a framework for community action in the field of marine environmental policy (Marine Strategy Framework Directive, 2008/56/EC)	EU directive	2008	Achieve or maintain good environmental status (GES) in the Community’s marine environment by the year 2020 at the latest, continue its protection and preservation, and prevent subsequent deterioration	Develop national marine strategies through assessment, determination of good environmental status, establishment of environmental targets, monitoring and application of measures to achieve or maintain good environmental status	Qualitative descriptors for determining GES. Lists of characteristics, pressures and impacts.	http://eur-lex.europa.eu/legal-content/EN/TXT/PDF/?uri=CELEX:32008L0056&rid=1	YES	X	X	X	X
European Commission	Communication from the Commission to the European Parliament, the Council, the European Economic and Social Committee and the Committee of the Regions concerning the European Union Strategy for the Baltic Sea Region (COM(2009) 248 final)	EC communication	2009	Sustainable development of the Baltic Sea Region	(1) To reduce nutrient inputs to the sea to acceptable levels; (2) To preserve natural zones and biodiversity including fisheries; (3) To reduce the use and impact of hazardous substances; (4) To become a model region for clean shipping; (5) To mitigate and adapt to climate change.	An action Plan is proposed that addresses four pillars, the first of which is 'An environmentally sustainable region'	https://eur-lex.europa.eu/legal-content/EN/TXT/PDF/?uri=CELEX:52009DC0248&qid=1524500109637&from=EN	NO	X
European Union	Directive on the conservation of wild birds (Birds Directive, 2009/147/EC)	EU directive	2009	Protect, manage and control European wild birds (as listed specifically) and their habitats, and lay down rules for their exploitation	Creation of protected areas; upkeep and management of habitats inside and outside the protected zones; re-establishment of destroyed biotopes; creation of biotopes	Special protection areas (SPAs) for the conservation of the listed bird species	http://eur-lex.europa.eu/LexUriServ/LexUriServ.do?uri=OJ:L:2010:020:0007:0025:EN:PDF	YES	X	X	X	X
European Commission	Our life insurance, our natural capital: an EU biodiversity strategy to 2020 (COM(2011)244)	EC communication	2011	Reverse biodiversity loss and speed up the EU's transition towards a resource efficient and green economy. Reflects the commitments taken by the EU within the Convention of Biological Diversity Ambitious strategy setting out 6 targets and 20 actions to halt the loss of biodiversity and ecosystem services in the EU by 2020 (source: European Commission)	Six specific targets on: (1) halting the deterioration in the status of all species and habitats, (2) maintaining and enhancing the ecosystems and their services, (3) aiming at sustainable agriculture and use of land, (4) acieving the maximum sustainable yield in fisheries, (5) controlling/managing/eradicating invasive alien species, (6) averting global biodiversity loss	The Commission will support and complement Member States’ efforts by enforcing environmental legislation, filling policy gaps by proposing new initiatives, providing guidelines, funding, and foster ing research and the exchange of best practice	http://eur-lex.europa.eu/legal-content/EN/TXT/PDF/?uri=CELEX:52011DC0244&rid=1	NO	X	X	X	X
General Fisheries Commission for the Mediterranean (GFCM)	Recommendation GFCM/35/2011/3 on reducing incidental bycatch of seabirds in fisheries in the GFCM area of application	GFCN recommendation	2011	Seabirds	To ensure that incidental catch of seabirds in fishing activities is monitored, recorded and kept to the lowest level as possible	Adoption of ad hoc technical measures to fishing gear and vessels	https://gfcm.sharepoint.com/CoC/_layouts/15/guestaccess.aspx?guestaccesstoken=%2bEiwjDIT29HKoIAdMy%2fbxiVFwWsbCnYb4P%2bWqpfLuLo%3d&docid=0703cf668ca284719b01cd14a961ca81b&rev=1	YES			X	X
European Union	Regulation no. 1380/2013 of the European Parliament and of the Council of 11 December 2013 on the Common Fisheries Policy	EU regulation	2013	Conservation of marine biological resources and management of fisheries targeting them, including aquaculture and recreational fishery	The Common Fishery Policy provides a regulation so that fishing and aquaculture activities are environmentally sustainable in the long-term and are managed in a way that is consistent with the objectives of achieving economic, social and employment benefits, and of contributing to the availability of food supplies	General and specific technical measures, including multiannual plans	http://eur-lex.europa.eu/legal-content/EN/TXT/?uri=celex%3A32013R1380	YES	X	X	X	X
General Fisheries Commission for the Mediterranean (GFCM)	Resolution GFCM/37/2013/1 on area based management of fisheries, including through the establishment of Fisheries Restricted Areas (FRAs) in the GFCM convention area and coordination with the UNEP-MAP initiatives on the establishment of SPAMIs	GFCM resolution	2013	Conservation and management of fisheries resources in coordination with the establishment of SPAMIs		Designation of FRAs	http://www.fao.org/3/a-ax392e.pdf	YES			X	X
European Commission	Communication from the Commission to the EU Parliament, the Council, the EU Economic and Social Committee of the Regions concerning the European Union Strategy for the Adriatic and Ionian Region (COM (2014) 0357 final)	EC communication	2014	To address environmental quality through cooperation at the level of the Region.	To contribute to good environmental status for marine and coastal ecosystems, reducing pollution of the sea, limiting, mitigating and compensating soil sealing, reducing air pollution and halting loss of biodiversity and degradation of ecosystems	An Action Plan is proposed that addresses four pillars, the third of which is 'Environmental quality'	https://eur-lex.europa.eu/legal-content/EN/TXT/PDF/?uri=CELEX:52014DC0357&rid=6	NO			X
European Union	Directive establishing a framework for maritime spatial planning (2014/89)	EU directive	2014	Contribute to the effective management of marine activities and the sustainable use of marine and coastal resources, by creating a framework for consistent, transparent, sustainable and evidence-based decision-making	Lay down obligations to establish a national maritime planning process, resulting in a maritime spatial plan or plans that include land-sea interactions. Consider economic, social and environmental aspects to support sustainable development and growth in the maritime sector, applying an ecosystem- based approach. Promote the coexistence of relevant activities and uses in the sea	Maritime spatial plans that take into account all human activites at sea as well as nature and species conservation sites and protected areas	http://eur-lex.europa.eu/legal-content/EN/TXT/PDF/?uri=CELEX:32014L0089&rid=1	YES	X	X	X	X
United Nations	Sustainable Development Goals - Agenda 2030	UN action plan	2015	To protect the planet from degradation, including through sustainable consumption and production, sustainably managing its natural resources and taking urgent action on climate change, so that it can support the needs of the present and future generations	Goal 13. Take urgent action to combat climate change and its impacts. Goal 14. Conserve and sustainably use the oceans, seas and marine resources for sustainable development.	Commitment to fully engage in conducting regular and inclusive reviews of progress at the subnational, national, regional and global levels	http://www.un.org/ga/search/view_doc.asp?symbol=A/RES/70/1&Lang=E	NO	X	X	X	X
European Commission	Communication from the Commission to the EU Parliament, the Council, the EU Economic and Social Committee of the Regions, Initiative for the sustainable development of the blue economy in the western Mediterranean (COM(2017) 0183 final)	EC communication	2017	Preserve ecosystems and biodiversity in the western Mediterranean region. Achieving healthy marine and coastal ecosystems while promoting socioeconomic development requires a solid institutional, legal and technical framework that can balance competing demands for limited natural resources and space	Assess the atmosphere-land-sea pressures and the risks for both ecosystems and human health. Help to establish and manage marine protected areas, reduce marine litter, manage ballast water and monitor acoustic pollution. Reinforce the local ability to identify invasive alien species and routes of invasion and the structure and functioning of marine ecosystems. Support awareness campaigns on marin…		https://eur-lex.europa.eu/legal-content/EN/TXT/PDF/?uri=CELEX:52017DC0183&rid=3	NO			X
